# Supplementary material
Source: Springer Nature journal article supplement (https://www.springermedizin.de/resource/supplementary/13075_2012_3627_MOESM3_ESM.pdf/9694956)
Supplement: MOESM3 [file 9694956]

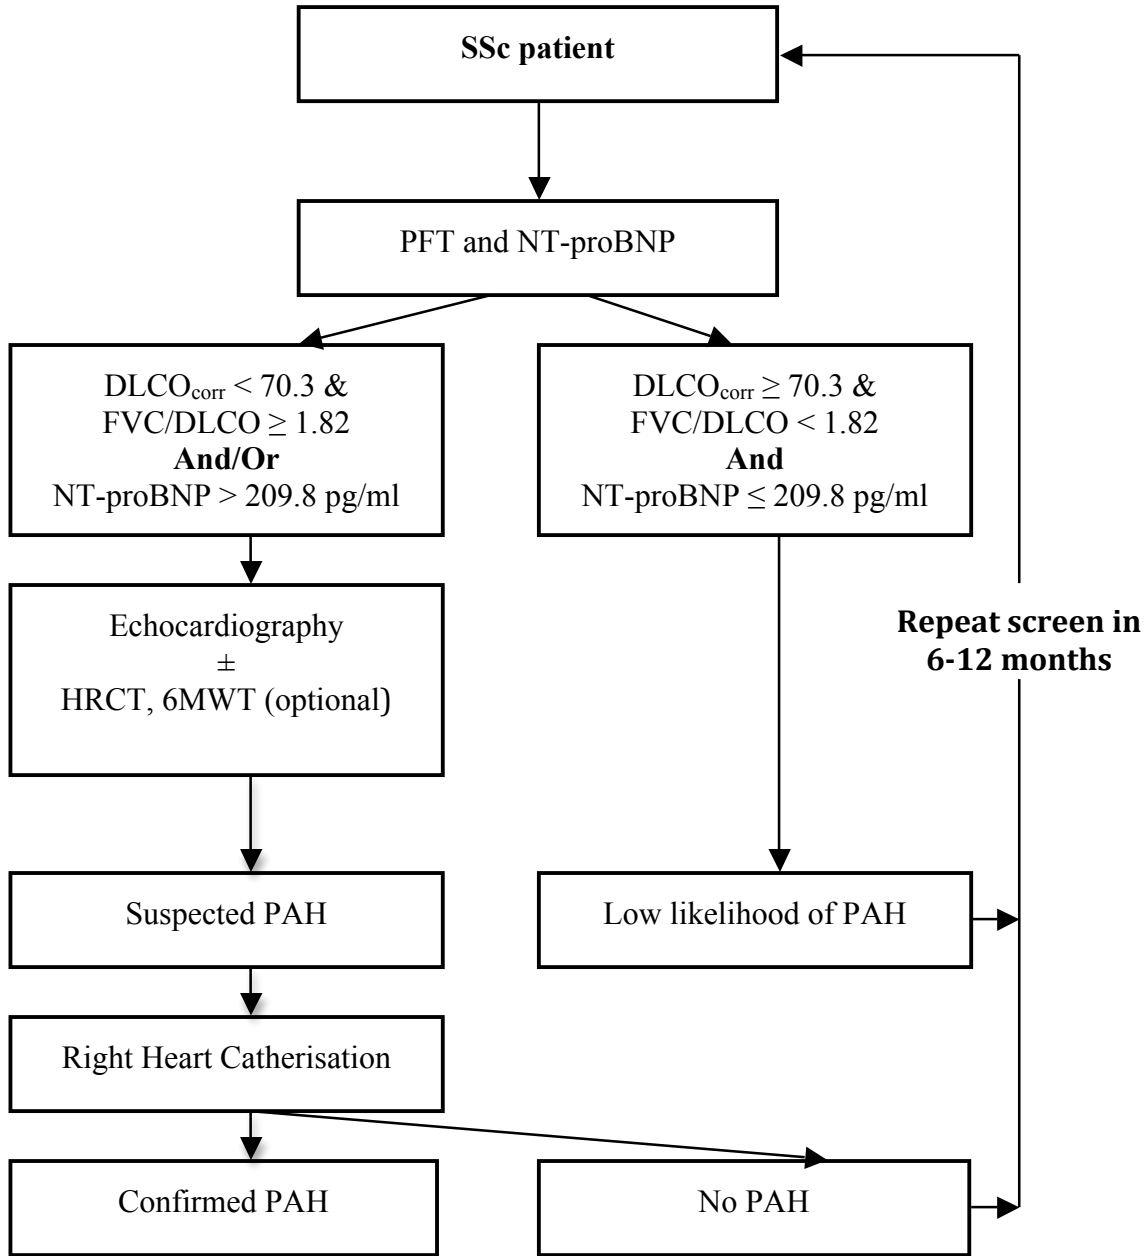

SSc patient

PFT and NT-proBNP

$DLCO_{corr} < 70.3$  &  
 $FVC/DLCO \geq 1.82$   
**And/Or**  
 $NT\text{-}proBNP > 209.8$  pg/ml

$DLCO_{corr} \geq 70.3$  &  
 $FVC/DLCO < 1.82$   
**And**  
 $NT\text{-}proBNP \leq 209.8$  pg/ml

Echocardiography  
±  
HRCT, 6MWT (optional)

Suspected PAH

Right Heart Catheterisation

Confirmed PAH

Low likelihood of PAH

No PAH

**Repeat screen in  
6-12 months**
